# Supplementary material for: Cryptic speciation in a benthic isopod from Patagonian and Falkland Island waters and the impact of glaciations on its population structure
Source: PubMed Central journal article supplement (PMC2644686; doi:10.1186/1742-9994-5-19), 2008-12-19
Supplement: 1742-9994-5-19-S3.pdf [file 1742-9994-5-19-S3.pdf]

**Supplement File 3:** Statistical tests for significant heterozygosity (H) excess or deficiency in three populations of *Serolis paradoxa* (PA, AO, FI) assuming three different mutation models (IAM, TPM, SMM). P-values of the Sign Test and Standardized Differences Test and one-tailed probability for heterozygosity deficiency are based on a 1000 permutations. Significant P-values are printed in bold. The TPM was adjusted to allow for 80% mutations according to a SMM and 20% to an IAM model.

| Population | Model | Sign Test                                  |                                             |                                             |               | Wilcoxon                              |
|------------|-------|--------------------------------------------|---------------------------------------------|---------------------------------------------|---------------|---------------------------------------|
|            |       | Expected<br>no of loci<br>with H<br>excess | Observed<br>no. of loci<br>with H<br>excess | observed no<br>of loci with<br>H deficiency | P             | P (one tailed<br>for H<br>deficiency) |
| <b>PA</b>  | IAM   | 4.00                                       | 6                                           | 1                                           | 0.1212        | 0.9453                                |
|            | TPM   | 4.04                                       | 4                                           | 3                                           | 0.6306        | 0.7109                                |
|            | SMM   | 4.03                                       | 3                                           | 4                                           | 0.3360        | 0.2891                                |
| <b>AO</b>  | IAM   | 4.17                                       | 3                                           | 4                                           | 0.2979        | 0.2343                                |
|            | TPM   | 4.10                                       | 1                                           | 6                                           | <b>0.0226</b> | <b>0.0117</b>                         |
|            | SMM   | 4.09                                       | 0                                           | 7                                           | <b>0.0021</b> | <b>0.0039</b>                         |
| <b>FI</b>  | IAM   | 4.06                                       | 4                                           | 3                                           | 0.6244        | 0.3438                                |
|            | TPM   | 4.14                                       | 2                                           | 5                                           | 0.1049        | 0.1484                                |
|            | SMM   | 4.16                                       | 2                                           | 5                                           | 0.1024        | <b>0.0195</b>                         |
